# Supplementary material
Source: publisher figshare collection journal article supplement (https://frontiersin.figshare.com/ndownloader/files/22724777)
Supplement: Supplementary file [file 22724777]

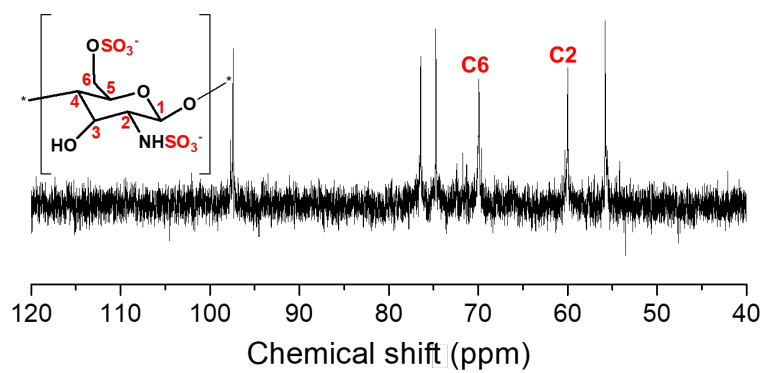

Figure S1.  $^{13}\text{C}$  NMR spectra of SCS.

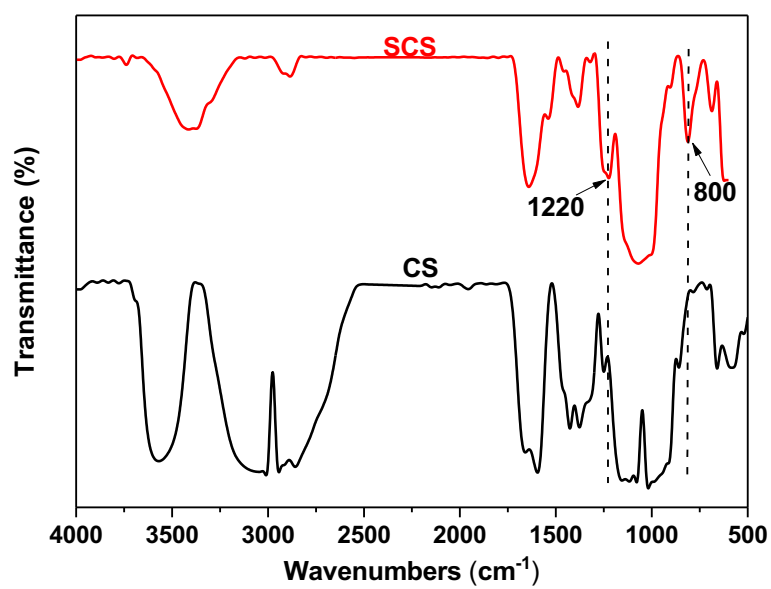

Figure S2. FTIR spectra of CS and SCS.

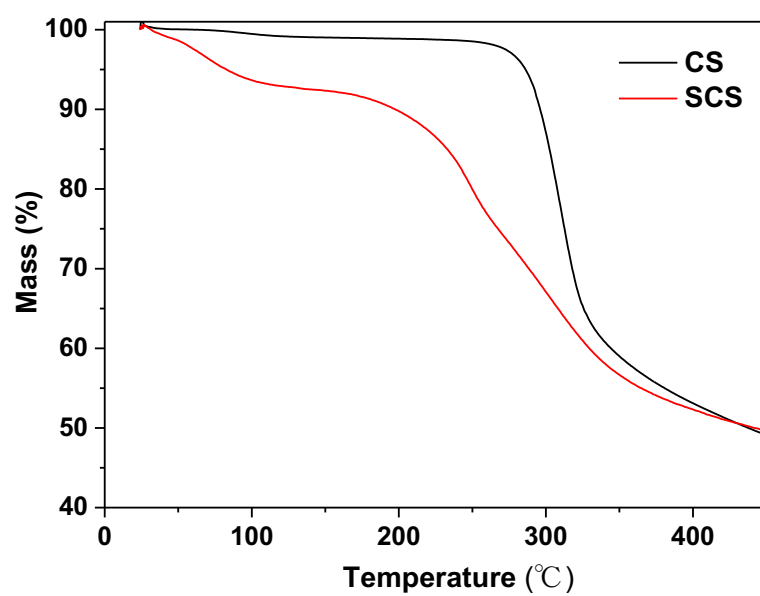

Figure S3. DSC curve of CS and SCS.
